# Supplementary material
Source: PubMed Central journal article supplement (PMC3370433)
Supplement: supp_CVI.00114-12_CVI-CVI00114-12-s01.pdf [file supp_CVI.00114-12_CVI-CVI00114-12-s01.pdf]

1 **Table S1: MHC class I T cell epitopes (nine-mer)**

| <b>Protein</b> | <b>Intermediate affinity binding</b> |                 | <b>High affinity binding</b> |                 |
|----------------|--------------------------------------|-----------------|------------------------------|-----------------|
|                | <b>Sequence</b>                      | <b>Position</b> | <b>Sequence</b>              | <b>Position</b> |
| MAP1297        | SETEYGSAL                            | 25-33           |                              |                 |
|                | ALYAGRFTL                            | 226-234         |                              |                 |
| MAP1653        | NPINTVGEL                            | 9-17            | AATRNTQVL                    | 44-52           |
| MAP3393c       | GMVASATPL                            | 77-85           | TEAPRVAVI                    | 4-12            |
|                | RIVEFQTQL                            | 144-152         |                              |                 |
|                | VSAHRTPGV                            | 41-49           |                              |                 |
|                | VPLGRLDGL                            | 92-100          |                              |                 |
|                | FQTQLADSV                            | 148-156         |                              |                 |
|                | AEFDVPAEV                            | 30-38           |                              |                 |
|                |                                      |                 |                              |                 |
| MAP2872c       | WAPLLWTSL                            | 116-124         | GSIVNTASI                    | 135-143         |
|                | LTLERFGSV                            | 75-83           | MYNATKAAL                    | 154-162         |
|                | YNATKAALI                            | 155-163         | HEDPLSSSI                    | 199-207         |
|                | LERFGSVDI                            | 77-85           |                              |                 |
|                | IEQDHARFA                            | 100-108         |                              |                 |
|                | DPLSSSIAL                            | 201-209         |                              |                 |
|                | TGASRGIGL                            | 14-22           |                              |                 |
| MAP1589c       | PAYELTALI                            | 11-19           | LPPFMLSDI                    | 106-114         |
|                | VVFFWPKDF                            | 49-57           |                              |                 |
|                | RELSLATGV                            | 116-124         |                              |                 |
| MAP4340        | FQVVS IPTL                           | 76-84           |                              |                 |

---

|          |           |         |            |         |
|----------|-----------|---------|------------|---------|
|          | CGPCKMVAP | 38-46   |            |         |
|          | VSIPTLILF | 79-87   |            |         |
| MAP2698c | HAIALRNYL | 110-118 | IALRNYLVV  | 112-120 |
|          | IMLLLKDNL | 71-79   | RPVANALTL  | 4-12    |
|          | NYLVVTREV | 116-124 | LEEPILSGL  | 173-181 |
|          | TYSQVETLV | 145-153 | EELPILSGLV | 174-182 |
|          | NEEARVQYV | 129-137 | HELFFSNLV  | 192-200 |
|          | VPYDRGENF | 38-46   | LEYTRDETI  | 204-212 |
|          | EEARVQYVM | 130-138 | TENDLRQVI  | 246-254 |
|          | EELWFAHDY | 29-37   | DEPALKPFV  | 265-273 |
|          | LEDYWGRWL | 92-100  | HRELVEHFI  | 83-91   |
| MAP1168c | AGPRTIEEF | 184-192 | PYLAGPRTI  | 181-189 |
|          | AAPSPVVRV | 143-151 | VPINPRHPL  | 66-74   |
|          | QQLSFYETI | 232-240 |            |         |
|          | IEEFIVPRI | 189-197 |            |         |
|          | PEESVLRQV | 263-271 |            |         |
|          | SELSAAPSF | 139-147 |            |         |
|          | RIIAAVPVL | 210-218 |            |         |
| MAP3567  | VIRAAWPHF | 130-138 | VGLINSLAL  | 172-180 |
|          | IAPIAATRM | 192-200 | RAVANYDSV  | 65-73   |
|          | TEDILPKEV | 201-209 | KYNIHANAI  | 184-192 |
|          | AEPAGAENI | 74-82   | NPNSASVFFV | 230-238 |

---

---

|          |            |         |            |         |
|----------|------------|---------|------------|---------|
|          | EENPNSASV  | 228-236 |            |         |
|          | VTYDKPPTV  | 255-263 |            |         |
|          | DEFGAVHGV  | 88-96   |            |         |
| MAP1017c | VNRAFETTL  | 217-225 | AEAERSGLV  | 174-182 |
|          | CELAMMCDV  | 116-124 | FETTLA EGL | 221-229 |
|          | VEREERVGI  | 14-22   |            |         |
|          | GKAKAMDLI  | 157-165 |            |         |
| MAP2487c | SSFEGPLPM  | 16-24   |            |         |
|          | YASSFEGPL  | 14-22   |            |         |
|          | QRLLGTREI  | 75-83   |            |         |
|          | KPPWAAEAF  | 112-120 |            |         |
|          | PPWAAEAF A | 113-121 |            |         |
|          | MPPSKHVAV  | 24-32   |            |         |
| MAP3268  | IEASYRDGV  | 102-110 | IEASYRDGV  | 102-110 |
| MAP1698c | MNMLRFDPF  | 1-9     | LPESLDVNV  | 56-64   |
|          | GVFSRQVYL  | 92-100  |            |         |
|          | AEAAKPRKI  | 125-133 |            |         |
|          | VEFDLPGVL  | 48-56   |            |         |
| MAP3651c | ISNARRSGL  | 177-185 | VSMPCYVRV  | 83-91   |
|          | VAGQGFSQM  | 249-257 | CYVRVTEQL  | 87-95   |
|          | SVGNYLADM  | 302-310 | SNARRSGLI  | 178-186 |
|          | TEDQKRAYL  | 121-129 | MEAGMAKLF  | 336-344 |
|          | RESVRWAQV  | 16-24   | IEQMKRIGI  | 61-69   |

---

---

|          |           |         |           |         |
|----------|-----------|---------|-----------|---------|
|          | EEDMLVATV | 27-35   | SPVSMPCYV | 81-89   |
|          | LVATVRAFI | 31-39   |           |         |
|          | QEYDVERYF | 367-375 |           |         |
|          | TEQLARGWM | 92-100  |           |         |
|          | LPRMASGEI | 129-137 |           |         |
| MAP3523c | ESPQWSAGV | 313-321 | NATTNCFPM | 115-123 |
|          | GGPSLIDCE | 556-564 | AYAQADNEI | 247-255 |
|          | SGPGFLNAL | 102-110 | SEFDSNQQI | 331-339 |
|          | SAGVKFVQV | 318-326 |           |         |
|          | HPMRFYNAL | 393-401 |           |         |
|          | ASGIRYLGf | 67-75   |           |         |
|          | ADNEIRRFV | 251-259 |           |         |
|          | VESTGIPFL | 259-267 |           |         |
|          | CDALAARPI | 355-363 |           |         |
|          | YRLPVTVVI | 488-496 |           |         |
|          | RPGGVYLDI | 182-190 |           |         |
|          | LPMSMAKGL | 267-275 |           |         |
|          | HPHGRSRHM | 7-15    |           |         |
| MAP0187c | WAVLGYDTV | 125-133 | LEPHISGQ  | 16-24   |
|          | WNVVNWADV | 182-190 | NEDHAAIFL | 53-61   |
|          | AFYLQYKNV | 165-173 | VPLGIIPLL | 149-157 |
|          | AIFLNEKNL | 58-66   |           |         |
|          | DYAALEPHI | 12-20   |           |         |

---

---

|          |           |         |           |         |
|----------|-----------|---------|-----------|---------|
|          | GYDTVGSRL | 129-137 |           |         |
|          | HHATYVKGV | 32-40   |           |         |
|          | NEKNLAFHL | 62-70   |           |         |
| MAP3974c | WGPVTGGTA | 90-98   | VEVVTLQVI | 57-65   |
|          | IGARLAELI | 151-159 |           |         |
| MAP2312c | AYYDAAAKM | 306-314 | NEEQKRKWL | 108-116 |
|          | YGFMNEYPV | 349-357 | KEAAIAKMI | 322-330 |
|          | VAITLEAGV | 88-96   | NEYPVARHY | 353-361 |
|          | EYQDLRDTV | 13-21   | SYQAISFKI | 285-293 |
|          | GYANFLSIL | 239-247 | YGFMNEYPV | 349-357 |
|          | KYAKERQSF | 271-279 |           |         |
|          | DYFALSLAL | 70-78   |           |         |
|          | EEHSFPYEV | 38-46   |           |         |
|          | QPIGSYQAI | 281-289 |           |         |
|          | APVSAKHDE | 30-38   |           |         |
|          | FPYEVVAKM | 42-50   |           |         |

---

- 2 The predicted epitope result is based on the scores of antigenic peptide processing (proteasomal  
3 cleavage and TAP transport) and MHC binding affinity. Score is categorized as intermediate  
4 binding affinity ( $IC_{50} < 500$  nM) and high binding affinity ( $IC_{50} < 50$  nM).

5 **Table S2: MHC class II T cell epitopes (fifteen-mers)**

| <b>Protein</b> | <b>Sequence</b>  | <b>Position</b> | <b>Sequence</b>  | <b>Position</b> |
|----------------|------------------|-----------------|------------------|-----------------|
| MAP1297        | LYAGRFTLPQALAAV  | 227-241         | YAGRFTLPQALAAVA  | 228-242         |
|                | ALYAGRFTLPQALAA  | 226-240         | AGRFTLPQALAAVAE  | 229-243         |
| MAP1653        | RTFNERAAGAGATVL  | 65-79           | FNERAAGAGATVLNV  | 67-81           |
|                | TFNERAAGAGATVLN  | 66-80           | NERAAGAGATVLNVS  | 68-82           |
|                | ERAAGAGATVLNVSK  | 69-83           | VGELPSVGSKAPAFS  | 14-28           |
|                | TVGELPSVGSKAPAF  | 13-27           | AGLLARAIIVVVGADG | 125-139         |
|                | PMAGLLARAIIVVGA  | 123-137         | MAGLLARAIIVVVGAD | 124-138         |
|                | GLLARAIIVVVGADGN | 126-140         | LLARAIIVVVGADGNV | 127-141         |
| MAP3393c       | LPGMVASATPLPVIG  | 75-89           | HLPGMVASATPLPVI  | 74-88           |
|                | AHLPGMVASATPLPV  | 73-87           | PGMVASATPLPVIGV  | 76-90           |
|                | GMVASATPLPVIGVP  | 77-91           | SIVQMPAGVPVATVS  | 105-119         |
|                | LSIVQMPAGVPVATV  | 104-118         | LLSIVQMPAGVPVAT  | 103-117         |
|                | IVQMPAGVPVATVSI  | 106-120         | SLLSIVQMPAGVPVA  | 102-116         |
| MAP2872c       | LAIAQQLAAAGANVV  | 22-36           | IAQQLAAAGANVVLT  | 24-38           |
|                | AQQLAAAGANVVLTA  | 25-39           | QQLAAAGANVVLTA   | 26-40           |
|                | VDILVNNAGTNPAYG  | 83-97           | SVDILVNNAGTNPAY  | 82-96           |
|                | ILVNNAGTNPAYGPL  | 85-99           | DILVNNAGTNPAYGP  | 84-98           |
|                | VLGAAQGRPAPTPS   | 245-259         | ADEAAAQVGPQALGV  | 45-59           |
|                | DEAAAQVGPQALGVG  | 46-60           | EAAAQVGPQALGVGA  | 47-61           |
|                | GSVDILVNNAGTNPA  | 81-95           |                  |                 |
| MAP2698c       | LGGRDWDPSATLPR   | 49-63           | FLGGRDWDPSATLP   | 48-62           |

---

|          |                  |         |                  |         |
|----------|------------------|---------|------------------|---------|
|          | GGRDWDPSATLPRP   | 50-64   | GRDWDPSATLPRPL   | 51-65   |
|          | RDWDPSATLPRPLT   | 52-66   |                  |         |
| MAP1168c | VYVAAMGPKALQVTG  | 159-173 | YVAAMGPKALQVTGE  | 160-174 |
|          | VAAMGPKALQVTGEL  | 161-175 | GPIPVYVAAMGPKA   | 154-168 |
|          | HGSELSAAPSFPVRV  | 137-151 | GSELSAAPSFPVRVP  | 138-152 |
|          | SELSAAPSFPVRVPG  | 139-153 | PLIVASLAQTAQAAA  | 73-87   |
|          | HPLIVASLAQTAQAA  | 72-86   | DDVEGARAAAAQQLS  | 221-235 |
|          | SDDVEGARAAAAQQL  | 220-234 | AVDFHGSELSAAPSF  | 133-147 |
|          | VDFHGSELSAAPSF   | 134-148 | LLSDDVEGARAAAAQ  | 218-232 |
|          | LSDDVEGARAAAAQQ  | 219-233 | FHGSELSAAPSFPVR  | 136-150 |
|          | GIILMAHPDAANLVD  | 4-18    | AGIILMAHPDAANLV  | 3-17    |
|          | DFHGSELSAAPSFPV  | 135-149 | GAVDFHGSELSAAPS  | 132-146 |
|          | IPVYVAAMGPKALQV* | 157-171 | PVYVAAMGPKALQVT* | 158-172 |
|          | TPIPVYVAAMGPKAL* | 155-169 | PIPVYVAAMGPKALQ* | 156-170 |
| MAP3567  | NIHANAIPIAATRM   | 186-200 | AKYNIHANAIPIAA   | 183-197 |
|          | KYNIHANAIPIAAT   | 184-198 | YNIHANAIPIAATR   | 185-199 |
|          | IHANAIPIAATRMT   | 187-201 |                  |         |
| MAP2487c | GYASSFEGPLMPPS   | 13-27   | YASSFEGPLMPPSK   | 14-28   |
|          | AGYASSFEGPLMPP   | 12-26   | SSFEGPLMPPSKHV   | 16-30   |
|          | ASSFEGPLMPPSKH   | 15-29   | HNAGYASSFEGPLPM  | 10-24   |
|          | QEETGIKPPWAAEAF  | 106-120 | NAGYASSFEGPLPMP  | 11-25   |
|          | EETGIKPPWAAEFA   | 107-121 |                  |         |
| MAP1698c | WGAVPWGTAAQPALV  | 21-35   |                  |         |

---

---

|          |                 |         |                  |         |
|----------|-----------------|---------|------------------|---------|
| MAP3651c | ELSFGNFRAPATAVL | 232-246 | LSFGNFRAPATAVLG  | 233-247 |
|          | CELSFGNFRAPATAV | 231-245 | SCELSFGNFRAPATA  | 230-244 |
|          | SFGNFRAPATAVLGG | 234-248 | LAVPEEYGGSPVSMPC | 72-86   |
|          | AVPEEYGGSPVSMPC | 73-87   | FGNFRAPATAVLGGV  | 235-249 |
|          | DQKRAYLPRMASGEI | 123-137 | EDQKRAYLPRMASGE  | 122-136 |
| MAP3523c | GPGFLNALPALANAT | 103-117 | PGFLNALPALANATT  | 104-118 |
|          | GFLNALPALANATTN | 105-119 | FLNALPALANATTNC  | 106-120 |
|          | NRNPASAASPAVSA  | 578-592 | ANRNPASAASPAAVS  | 577-591 |
|          | LANRNPASAASPAAV | 576-590 | RNPASAASPAAVSAG  | 579-593 |
|          | LNALPALANATTNCF | 107-121 | NPASAASPAAVSAGA  | 580-594 |
|          | HLANRNPASAASPAA | 575-589 | SGPGFLNALPALANA  | 102-116 |
|          | MSATSASAGPAPESA | 15-29   | TSGPGFLNALPALAN  | 101-115 |
|          | SATSASAGPAPESAR | 16-30   | ATSASAGPAPESARL  | 17-31   |
|          | GHLANRNPASAASPA | 574-588 | TSASAGPAPESARLI  | 18-32   |
|          | GFRQEASAGNAAAAA | 74-88   | HMSATSASAGPAPES  | 14-28   |
|          | FRQEASAGNAAAAAG | 75-89   | SASAGPAPESARLID  | 19-33   |
|          | SGHLANRNPASAASP | 573-587 | LGFRQEASAGNAAAA  | 73-87   |
|          | VDPAPRQLPAPEAVD | 212-226 | PAPRQLPAPEAVDRA  | 214-228 |
|          | VVDPAPRQLPAPEAV | 211-225 | DPAPRQLPAPEAVDR  | 213-227 |
|          | RHMSATSASAGPAPE | 13-27   | FGGKGYHVSTAAELR  | 532-546 |
|          | AFGGKGYHVSTAAEL | 531-545 | GGKGYHVSTAAELRA  | 533-547 |
|          | TTSGPGFLNALPALA | 100-114 | APRQLPAPEAVDRAL  | 215-229 |
|          | RQEASAGNAAAAAGF | 76-90   | QEASAGNAAAAAGFL  | 77-91   |

---



---

|          |                 |         |                 |         |
|----------|-----------------|---------|-----------------|---------|
|          | ESGHLANRNPASAAS | 572-586 | PMRFYNALGAIRAVL | 394-408 |
|          | HPMRFYNALGAIRAV | 393-407 | PHPMRFYNALGAIRA | 392-406 |
|          | YLGFRQEASAGNAAA | 72-86   |                 |         |
| MAP0187c | VQKRYAAATSKAQGL | 190-204 | ADVQKRYAAATSKAQ | 188-202 |
|          | DVQKRYAAATSKAQG | 189-203 | QKRYAAATSKAQGLI | 191-205 |
|          | KRYAAATSKAQGLIF | 192-206 | DLDWDYAALEPHISG | 8-22    |
|          | LDWDYAALEPHISGQ | 9-23    | PDLWDYAALEPHIS  | 7-21    |
|          | WDYAALEPHISGQIN | 11-25   | DWDYAALEPHISGQI | 10-24   |
|          | FDKFRAQFSAAANGL | 106-120 | GSFDKFRAQFSAAAN | 104-118 |
|          | DKFRAQFSAAANGLQ | 107-121 | SFDKFRAQFSAAANG | 105-119 |
|          | RYAAATSKAQGLIFG | 193-207 | KFRAQFSAAANGLQG | 108-122 |
|          | FGSFDKFRAQFSAAA | 103-117 | WADVQKRYAAATSKA | 187-201 |
| MAP2312c | KIARMEARAHVARTA | 292-306 |                 |         |

---

6 The predicted epitope is the result of consensus prediction between ARB and SMM\_align  
7 algorithm methods. Except for the protein encoded by MAP1168c all the proteins were predicted  
8 only with intermediate binding affinity ( $IC_{50} < 500$  nM). Protein encoded by MAP1168c was also  
9 predicted with high binding affinity\* ( $IC_{50} < 50$  nM) epitopes in addition to intermediate binding  
10 affinity epitopes.

11

12 **Table S3: The 3D structure template and description used for epitope prediction**

| <b>Protein</b> | <b>PDB ID</b> | <b>Description of 3D structure template molecule</b>                                                                                         |
|----------------|---------------|----------------------------------------------------------------------------------------------------------------------------------------------|
| MAP1297        | 2VEP          | Crystal structure of the bifunctional protein pria (Wright et al 2008)                                                                       |
| MAP1653        | 1Y25          | Structure of <i>Mycobacterial</i> thiol peroxidase <i>Tpx</i> (Stehr et al 2006)                                                             |
| MAP3393c       | 1O4V          | Crystal structure of phosphoribosylaminoimidazole mutase <i>PurE</i> (Tm0446) from <i>Thermotoga maritima</i> A (Schwarzenbacher et al 2004) |
| MAP2872c       | 2ZAT          | Crystal structure of a mammalian reductase (Tanaka et al 2008)                                                                               |
| MAP1589c       | 2BMX          | <i>Mycobacterium tuberculosis</i> <i>AhpC</i> (Guimaraes et al 2005)                                                                         |
| MAP4340        | 1NW2*         | The crystal structure of the mutant R82e of thioredoxin from <i>Alicyclobacillus acidocaldarius</i> (Pedone et al 1999)                      |
|                | 2ILU          | Crystal structure of lactaldehyde dehydrogenase from <i>E. coli</i> : the binary complex with NADPH aldehyde dehydrogenase A                 |
| MAP2698c       | 1ZAO          | X-ray structure of putative Acyl-Acp desaturase <i>DesA2</i> from <i>Mycobacterium tuberculosis</i> H37rv (Dyer et al 2005)                  |
| MAP1168c       | 1EZW          | Structure of co-enzyme F420 dependent tetrahydromethanopterin reductase from <i>Methanopyrus kandleri</i> (Shima et al 200)                  |
| MAP3567        | 1ZBQ          | Crystal structure of human 17-beta-hydroxysteroid dehydrogenase type 4 in complex with NAD (Lukacik et al 2006)                              |
| MAP1017c       | 3H81          | Crystal structure of enoyl-CoA hydratase from <i>Mycobacterium tuberculosis</i> (Edwards et al unpublished)                                  |
| MAP2487c       | 1YLK          | Crystal structure of Rv1284 from <i>Mycobacterium tuberculosis</i> in complex with thiocyanate (Covarrubias et al 2005)                      |

---

|          |       |                                                                                                                                                            |
|----------|-------|------------------------------------------------------------------------------------------------------------------------------------------------------------|
| MAP3268  | 1SHS  | Small heat shock protein from <i>Methanococcus jannaschii</i> (Kim et al 1998)                                                                             |
| MAP1698c | 1SHS  | Small heat shock protein from <i>Methanococcus jannaschii</i> (Kim et al 1998)                                                                             |
| MAP3651c | 2PGO* | Crystal structure of Acyl-CoA dehydrogenase from <i>Geobacillus kaustophilus</i> (Chen et al unpublished)                                                  |
|          | 2CX9  | Crystal structure of acyl-CoA dehydrogenase                                                                                                                |
| MAP3523c | 2Q27* | Crystal structure of oxalyl-CoA decarboxylase from <i>E. coli</i> (Werther et al 2006)                                                                     |
|          | 2Q29  | Crystal structure of oxalyl-coA decarboxylase from <i>Escherichia coli</i> in complex with acetyl coenzyme A oxalyl-CoA decarboxylase (Werther et al 2006) |
| MAP0187c | 1GN3  | H145q mutant of <i>Mycobacterium tuberculosis</i> iron-superoxide dismutase (Bunting et al unpublished)                                                    |
| MAP2312c | 1JQI  | Crystal structure of rat short chain Acyl-CoA dehydrogenase complexed with acetoacetyl-CoA (Battaile et al 2002)                                           |

---

13 3D structure templates were modelled by both Ellipro and SWISS-MODEL Workspace.

14 \* 3D structure template modelled only by Ellipro but not by SWISS-MODEL Workspace.

15 **Table S4: Conformational B cell epitope at minimum cut-off score of 0.8**

| <b>Protein-PDB ID</b> | <b>Residue</b>                                                                                                                           | <b>No.</b> | <b>Score</b> |
|-----------------------|------------------------------------------------------------------------------------------------------------------------------------------|------------|--------------|
| MAP1297-2VEP          |                                                                                                                                          |            |              |
| Epitope 1             | D84, D85, D86                                                                                                                            | 3          | 0.853        |
| Epitope 2             | A113, R114, Q160                                                                                                                         | 3          | 0.849        |
| Epitope 3             | M1, S203, D205, R208, A239, A240, A242, E243                                                                                             | 8          | 0.843        |
| MAP1653-1Y25          |                                                                                                                                          |            |              |
| Epitope 1             | G8, N9, P10                                                                                                                              | 3          | 0.976        |
| Epitope 2             | G94, A95, E96, G97, I98, E99                                                                                                             | 6          | 0.822        |
| MAP3393c-1O4V         |                                                                                                                                          |            |              |
| Epitope 1             | L166, H167, G168, K169, V170, T171, G172, Q173                                                                                           | 8          | 0.931        |
| Epitope 2             | E161, A162, Q164, R165                                                                                                                   | 4          | 0.887        |
| Epitope 3             | M1, S2, V3, T4, E5                                                                                                                       | 5          | 0.858        |
| MAP2872c-2ZAT         |                                                                                                                                          |            |              |
| Epitope 1             | M1, T2, S3, Q4                                                                                                                           | 4          | 0.921        |
| Epitope 2             | A50, G53, P54, Q55, A56, L57                                                                                                             | 6          | 0.849        |
| Epitope 3             | P94, A95, Y96, G97, P98, L99, I100, E101, Q102, D103,<br>H104, A105, R106, F107, A151                                                    | 15         | 0.845        |
| Epitope 4             | K41, Q42, E43, D46                                                                                                                       | 4          | 0.840        |
| Epitope 5             | L195, W196, K197, D198, H199, E200, D201,<br>P202, S204, S205, S206, A208, L209, G210,<br>R211, G243, T244, A255, P256, T257, P258, S259 | 22         | 0.816        |
| MAP1589c-2BMX         |                                                                                                                                          |            |              |

---

|                |                                                                                                                                                |    |       |
|----------------|------------------------------------------------------------------------------------------------------------------------------------------------|----|-------|
| Epitope 1      | E189, L190, L191, K192, A193, S194, A195                                                                                                       | 7  | 0.978 |
| Epitope 2      | K180, G181, D182, P183, T184, L185, N186, A187, T188                                                                                           | 9  | 0.933 |
| Epitope 3      | D22, L23, S24, K25, V26, D27, A28, K29, Q30, P31, G32, D33                                                                                     | 12 | 0.859 |
| MAP4340-1NW2   |                                                                                                                                                |    |       |
| Epitope 1      | M1, T2, D3, A4, E5, K6, A7, S8                                                                                                                 | 8  | 0.855 |
| Epitope 2      | H58, S110, V113, P114, N115, L116, G117                                                                                                        | 7  | 0.808 |
| MAP2698c-1ZA0A |                                                                                                                                                |    |       |
| Epitope 1      | V38, P39, Y40, D41, R42, G43, E44, N45, F46, A47, F48                                                                                          | 11 | 0.921 |
| Epitope 2      | R259, A260, W261                                                                                                                               | 3  | 0.914 |
| Epitope 3      | G262, V263, A264, D265, E266, P267, A268, L269, K270                                                                                           | 9  | 0.891 |
| Epitope 4      | Y206, T207, R208, D209                                                                                                                         | 4  | 0.885 |
| MAP1168c-1EZWA |                                                                                                                                                |    |       |
| Epitope 1      | R244, A248, G251, L252, S253, N254, A255, V256, E257, L258, A259, A260, I261, G262, P263, E264, E265, S266, R269                               | 19 | 0.918 |
| Epitope 2      | H130, S131, G132, A133, V134, D135, F136, H137, G138, S139, E140, L141, S142, A143, A144, P145, S146, F147, P148, V149, R150, V151, P152, G153 | 24 | 0.850 |
| Epitope 3      | K199, A202, E203, A204, G205, R206, P207                                                                                                       | 7  | 0.849 |

---

---

|                |                                                                                                                                                                                                            |    |       |
|----------------|------------------------------------------------------------------------------------------------------------------------------------------------------------------------------------------------------------|----|-------|
| Epitope 4      | D222, V223, E224, G225, A226, R227, V293                                                                                                                                                                   | 7  | 0.842 |
| MAP3567-1ZBQE  |                                                                                                                                                                                                            |    |       |
| Epitope 1      | Q251, N252, A253, G254, V255, T256, Y257, D258, 29<br>K259, P260, P261, T262, V263, Q264,<br>D265, V266, A267, A268, R269, W270, D271,<br>E272, I273, T274, D275, L276, S277, A278, A279                   | 29 | 0.918 |
| Epitope 2      | F108, M111, L112, F113                                                                                                                                                                                     | 4  | 0.887 |
| Epitope 3      | K285, L286, G287                                                                                                                                                                                           | 3  | 0.848 |
| Epitope 4      | L205, P206, K207, E208, V209, A211, K212, L213                                                                                                                                                             | 8  | 0.835 |
| Epitope 5      | D105, G106, T107, H109, K110, N158, F159, G160                                                                                                                                                             | 8  | 0.814 |
| MAP1017c-3H81C |                                                                                                                                                                                                            |    |       |
| Epitope 1      | A77, E78, L79, T80, F81, A82, D83, A84, Y85, G86, 11<br>D88                                                                                                                                                | 11 | 0.895 |
| Epitope 2      | E222, T223, T224, L225, A226, E227, L229, L230, 32<br>R233, R234, H237, S238, F240, A241, T242, A243,<br>Q245, T246, E247, G248, M249, A250, A251, F252,<br>V253, E254, K255, R256, A257, P258, N259, F260 | 32 | 0.876 |
| Epitope 3      | M1, T2, D3, S4, T5, D6, T8, F9                                                                                                                                                                             | 8  | 0.804 |
| Epitope 4      | G157, K158, A159                                                                                                                                                                                           | 3  | 0.801 |
| MAP2487c-1YLKA |                                                                                                                                                                                                            |    |       |
| Epitope 1      | A2, D5, L8, A9, A12, G13, A15, S16, S17, F18, E19, 14<br>G20, P21, L22                                                                                                                                     | 14 | 0.879 |
| Epitope 2      | K102, R103, G104, I105, Q106, E107, E108, T109, 14                                                                                                                                                         | 14 | 0.879 |

---

---

| G110, I111, K112, P113, P114, W115 |                                                                                                                              |    |       |
|------------------------------------|------------------------------------------------------------------------------------------------------------------------------|----|-------|
| MAP3268-1SHSD                      |                                                                                                                              |    |       |
| Epitope 1                          | T138, E139, T140, A141, R142, E143, V144, V145, N146, A147                                                                   | 10 | 0.874 |
| Epitope 2                          | A79, T80, E81, R82, P83, R84, G85, V86, F87, S88, R89, E90                                                                   | 12 | 0.860 |
| Epitope 3                          | D72, P73, S74, R75, E76                                                                                                      | 5  | 0.838 |
| Epitope 4                          | L113, H114, I115, P116, V117                                                                                                 | 5  | 0.823 |
| MAP1698c-1SHSD                     |                                                                                                                              |    |       |
| Epitope 1                          | H140, Q141, R142, A143, I144, N145, A146                                                                                     | 7  | 0.962 |
| Epitope 2                          | I133, E134, V135, A136, A137, G138, K139                                                                                     | 7  | 0.889 |
| Epitope 3                          | N83, G84, V85, V86, S87, E88, R89                                                                                            | 7  | 0.827 |
| Epitope 4                          | D79, E80, D81, R82                                                                                                           | 4  | 0.803 |
| MAP3651c-2PGO                      |                                                                                                                              |    |       |
| Epitope 1                          | R16, E17, S18, V19, R20                                                                                                      | 5  | 0.966 |
| Epitope 2                          | A396, L399, V400, T401, R402, G403, G404, I405                                                                               | 8  | 0.936 |
| Epitope 3                          | Y286, A287, Q288, Q289, R290, E291, S292, F293, G294, Q295, P296, I297, W298, Q299, H300, Q301, S302, V303, G304, N305, Y306 | 21 | 0.916 |
| Epitope 4                          | L160, P161, D162, P163, D164, S165, D166, G167                                                                               | 8  | 0.886 |
| Epitope 5                          | T192, D193, P194, K195, A196, T197, P198                                                                                     | 7  | 0.860 |
| Epitope 6                          | G361, G362, Y363, Y365, S366, Q367, E368, Y369                                                                               | 8  | 0.843 |
| Epitope 7                          | V7, A9, Q10, Q11, V12, D13, V14, W21, A22, Q23                                                                               | 10 | 0.831 |

---

---

|               |                                                                                                                                                                                                                                    |    |       |
|---------------|------------------------------------------------------------------------------------------------------------------------------------------------------------------------------------------------------------------------------------|----|-------|
| Epitope 8     | G213, G236, N237                                                                                                                                                                                                                   | 3  | 0.818 |
| Epitope 9     | M1, G2, A3, N4, S5                                                                                                                                                                                                                 | 5  | 0.812 |
| Epitope 10    | N25, D26, E27                                                                                                                                                                                                                      | 3  | 0.807 |
| MAP3523c-2Q27 |                                                                                                                                                                                                                                    |    |       |
| Epitope 1     | M1, A2, G3, Q4                                                                                                                                                                                                                     | 4  | 0.995 |
| Epitope 2     | Y5, P6, H7, P8, H9, G10, R11                                                                                                                                                                                                       | 7  | 0.986 |
| Epitope 3     | S12, R13, H14, M15, S16, A17, T18, S19, A20, S21, A22, G23, P24, A25, P26, E27, S28, A29, R30                                                                                                                                      | 19 | 0.939 |
| Epitope 4     | A582, S583, A584, A585, S586, P587, A588, A589, V590, S591, A592, G593, A594                                                                                                                                                       | 13 | 0.920 |
| Epitope 5     | P220, A221, P222, E223, A224, V225, D226, R227, A228, L229, D230, V231, L232, A233, D234, A235, R236, R237, P238, S261, T262, G263, I264, A295, D296, D356, A357, L358, A359, A360, R361, P362, I363, T364, V365, P366, A367, E371 | 38 | 0.852 |
| Epitope 6     | R504, G505, D506, E507, A508, P509, H510, G511, D512, D513, P514, A515, P516, T517, V518, P567                                                                                                                                     | 16 | 0.841 |
| Epitope 7     | S130, D131, A133, L134, V135, D136, L137, R138, R139, G140, D141, Y142, D144, L145                                                                                                                                                 | 14 | 0.832 |
| Epitope 8     | L519, S520, A521, R522, A523, R524, L527, E530, A531, F532, H538                                                                                                                                                                   | 11 | 0.816 |
| Epitope 9     | S318, A319, G320, V321, K322                                                                                                                                                                                                       | 5  | 0.809 |
| MAP0187c-1GN3 |                                                                                                                                                                                                                                    |    |       |

---



---

|               |                                                                                                                        |    |       |
|---------------|------------------------------------------------------------------------------------------------------------------------|----|-------|
| Epitope 1     | S199, K200, A201, Q202, G203, L204, I205, F206, G207                                                                   | 9  | 0.900 |
| Epitope 2     | A45, K46, L47, E48, E49, A50, R51, A52, N53, E54, D55, H56, A57, A58, I59, F60, L61                                    | 17 | 0.895 |
| MAP2312c-1JQI |                                                                                                                        |    |       |
| Epitope 1     | A382, R383, S384, L385, G386, L387, S388                                                                               | 7  | 0.938 |
| Epitope 2     | Y272, A273, K274, E275, R276, Q277, S278, F279, G280, Q281, P282, I283, G284, S285, Y286, Q287, A288, I289, S290, F291 | 20 | 0.936 |
| Epitope 3     | G347, G348, Y349, F351, M352, N353, E354, Y355                                                                         | 8  | 0.870 |
| Epitope 4     | A7, G8, T9, L10, P11, K12, Q15, D16                                                                                    | 8  | 0.863 |
| Epitope 5     | R147, L148, E149, D150, G151, E152, V154, N156, T198, P199, G200, S223, D224, R226, E229                               | 15 | 0.859 |
| Epitope 6     | G180, T181, V182, G183, A184, D185, K187, G237                                                                         | 8  | 0.850 |
| Epitope 7     | M1, T2, T3                                                                                                             | 3  | 0.808 |
| Epitope 8     | A316, G317, K318, P319                                                                                                 | 4  | 0.807 |

---

16

17

18
